# Supplementary material for: RaPID discovery of cell-permeable helical peptide inhibitors con-taining cyclic β-amino acids against SARS-CoV-2 main protease
Source: Royal Society of Chemistry journal article supplement (doi:10.1039/d5cb00021a), 2025-01-01
Supplement: d5cb00021a1.xlsx [file d5cb00021a1.xlsx]

## Sheet: Supplementary Table 1 (a)
Supplementary Table 1 (a). List of RNAs and corresponding primers.
Gm indicates 2'-O-methylguanosine.
Name	RNA	Extension primer (forward)	Extension primer (reverse)	PCR primer (forward)	PCR primer (reverse)
dFx	GGAUCGAAAGAUUUCCGCAUCCCCGAAAGGGUACAUGGCGUUAGGU	GTAATACGACTCACTATAGGATCGAAAGATTTCCGC	ACCTAACGCCATGTACCCTTTCGGGGATGCGGAAATCTTTCGATCC	GGCGTAATACGACTCACTATAG	ACCTAACGCCATGTACCCT
eFx	GGAUCGAAAGAUUUCCGCGGCCCCGAAAGGGGAUUAGCGUUAGGU	GTAATACGACTCACTATAGGATCGAAAGATTTCCGC	ACCTAACGCTAATCCCCTTTCGGGGCCGCGGAAATCTTTCGATCC	GGCGTAATACGACTCACTATAG	ACCTAACGCTAATCCCCT
tRNA fMet(CAU)	CGCGGGGUGGAGCAGCCUGGUAGCUCGUCGGGCUCAUAACCCGAAGAUCGUCGGUUCAAAUCCGGCCCCCGCAACCA	GTAATACGACTCACTATACGCGGGGTGGAGCAGCCTGGTAGCTCGTCGGGCTCATAACCCGAAGATCG	TGGTTGCGGGGGCCGGATTTGAACCGACGATCTTCGGGTTATGAGC	GGCGTAATACGACTCACTATAC	TGmGTTGCGGGGGCCGGA
tRNA Pro1E2(CAU)	GGGUGAUUGGCGCAGCCUGGUAGCGCACUUCGCUCAUAACGAAGGGGUCAGGGGUUCGAAUCCCCUAUCACCCGCCA	GTAATACGACTCACTATAGGGTGATTGGCGCAGCCTGGTAGCGCACTTCG	TGGCGGGTGATAGGGGATTCGAACCCCTGACCCCTTCGTTATGAGCGAAGTGCGCTACCAGG	GGCGTAATACGACTCACTATAG	TGmGCGGGTGATAGGGGATTC

## Sheet: Supplementary Table 1 (b)
Supplementary Table 1 (b). Oligonucleotides for library construction
fM, formyl-Met; X, any 15 amino acids (A, C, D, F, G, H, I, L, N, P, R, S, T, V, Y)
N : A, U, G, or C
Name	Encoded ORF	RNA	Extension primer (forward)	Extension primer (reverse)	PCR primer (forward)	PCR primer (reverse)
7-1	fMXXMXXMTGVTNG	GGGUUGAACUUUAAGUAGGAGAUAUAUCCAUGNNUNNUAUGNNUNNUAUGACGGGUGUGACUAACGGUUAGGACGGGGGGCGGAAA	TAATACGACTCACTATAGGGTTGAACTTTAAGTAGGAGATATATCCAT	ACCGTTAGTCACACCCGTCATANNANNCATANNANNCATGGATATATCTCCTACTTAAAG	GGCGTAATACGACTCACTATAG	TTTCCGCCCCCCGTCCTAACCGTTAGTCACACCCGT
7-2	fMXMXXMXTGVTNG	GGGUUGAACUUUAAGUAGGAGAUAUAUCCAUGNNUAUGNNUNNUAUGNNUACGGGUGUGACUAACGGUUAGGACGGGGGGCGGAAA	TAATACGACTCACTATAGGGTTGAACTTTAAGTAGGAGATATATCCAT	ACCGTTAGTCACACCCGTANNCATANNANNCATANNCATGGATATATCTCCTACTTAAAG	GGCGTAATACGACTCACTATAG	TTTCCGCCCCCCGTCCTAACCGTTAGTCACACCCGT
8-1	fMXXMXXMXTGVTNG	GGGUUGAACUUUAAGUAGGAGAUAUAUCCAUGNNUNNUAUGNNUNNUAUGNNUACGGGUGUGACUAACGGUUAGGACGGGGGGCGGAAA	TAATACGACTCACTATAGGGTTGAACTTTAAGTAGGAGATATATCCAT	ACCGTTAGTCACACCCGTANNCATANNANNCATANNANNCATGGATATATCTCCTACTTAAAG	GGCGTAATACGACTCACTATAG	TTTCCGCCCCCCGTCCTAACCGTTAGTCACACCCGT
8-2	fMXMXXMXXTGVTNG	GGGUUGAACUUUAAGUAGGAGAUAUAUCCAUGNNUAUGNNUNNUAUGNNUNNUACGGGUGUGACUAACGGUUAGGACGGGGGGCGGAAA	TAATACGACTCACTATAGGGTTGAACTTTAAGTAGGAGATATATCCAT	ACCGTTAGTCACACCCGTANNANNCATANNANNCATANNCATGGATATATCTCCTACTTAAAG	GGCGTAATACGACTCACTATAG	TTTCCGCCCCCCGTCCTAACCGTTAGTCACACCCGT
9-1	fMXXMXXMXXTGVTNG	GGGUUGAACUUUAAGUAGGAGAUAUAUCCAUGNNUNNUAUGNNUNNUAUGNNUNNUACGGGUGUGACUAACGGUUAGGACGGGGGGCGGAAA	TAATACGACTCACTATAGGGTTGAACTTTAAGTAGGAGATATATCCAT	ACCGTTAGTCACACCCGTANNANNCATANNANNCATANNANNCATGGATATATCTCCTACTTAAAG	GGCGTAATACGACTCACTATAG	TTTCCGCCCCCCGTCCTAACCGTTAGTCACACCCGT
9-2	fMXMXXMXXMTGVTNG	GGGUUGAACUUUAAGUAGGAGAUAUAUCCAUGNNUAUGNNUNNUAUGNNUNNUAUGACGGGUGUGACUAACGGUUAGGACGGGGGGCGGAAA	TAATACGACTCACTATAGGGTTGAACTTTAAGTAGGAGATATATCCAT	ACCGTTAGTCACACCCGTCATANNANNCATANNANNCATANNCATGGATATATCTCCTACTTAAAG	GGCGTAATACGACTCACTATAG	TTTCCGCCCCCCGTCCTAACCGTTAGTCACACCCGT
10-1	fMXXMXXMXXMTGVTNG	GGGUUGAACUUUAAGUAGGAGAUAUAUCCAUGNNUNNUAUGNNUNNUAUGNNUNNUAUGACGGGUGUGACUAACGGUUAGGACGGGGGGCGGAAA	TAATACGACTCACTATAGGGTTGAACTTTAAGTAGGAGATATATCCAT	ACCGTTAGTCACACCCGTCATANNANNCATANNANNCATANNANNCATGGATATATCTCCTACTTAAAG	GGCGTAATACGACTCACTATAG	TTTCCGCCCCCCGTCCTAACCGTTAGTCACACCCGT
10-2	fMXMXXMXXMXTGVTNG	GGGUUGAACUUUAAGUAGGAGAUAUAUCCAUGNNUAUGNNUNNUAUGNNUNNUAUGNNUACGGGUGUGACUAACGGUUAGGACGGGGGGCGGAAA	TAATACGACTCACTATAGGGTTGAACTTTAAGTAGGAGATATATCCAT	ACCGTTAGTCACACCCGTANNCATANNANNCATANNANNCATANNCATGGATATATCTCCTACTTAAAG	GGCGTAATACGACTCACTATAG	TTTCCGCCCCCCGTCCTAACCGTTAGTCACACCCGT
11-1	fMXXMXXMXXMXTGVTNG	GGGUUGAACUUUAAGUAGGAGAUAUAUCCAUGNNUNNUAUGNNUNNUAUGNNUNNUAUGNNUACGGGUGUGACUAACGGUUAGGACGGGGGGCGGAAA	TAATACGACTCACTATAGGGTTGAACTTTAAGTAGGAGATATATCCAT	ACCGTTAGTCACACCCGTANNCATANNANNCATANNANNCATANNANNCATGGATATATCTCCTACTTAAAG	GGCGTAATACGACTCACTATAG	TTTCCGCCCCCCGTCCTAACCGTTAGTCACACCCGT
11-2	fMXMXXMXXMXXTGVTNG	GGGUUGAACUUUAAGUAGGAGAUAUAUCCAUGNNUAUGNNUNNUAUGNNUNNUAUGNNUNNUACGGGUGUGACUAACGGUUAGGACGGGGGGCGGAAA	TAATACGACTCACTATAGGGTTGAACTTTAAGTAGGAGATATATCCAT	ACCGTTAGTCACACCCGTANNANNCATANNANNCATANNANNCATANNCATGGATATATCTCCTACTTAAAG	GGCGTAATACGACTCACTATAG	TTTCCGCCCCCCGTCCTAACCGTTAGTCACACCCGT
12-1	fMXXMXXMXXMXXTGVTNG	GGGUUGAACUUUAAGUAGGAGAUAUAUCCAUGNNUNNUAUGNNUNNUAUGNNUNNUAUGNNUNNUACGGGUGUGACUAACGGUUAGGACGGGGGGCGGAAA	TAATACGACTCACTATAGGGTTGAACTTTAAGTAGGAGATATATCCAT	ACCGTTAGTCACACCCGTANNANNCATANNANNCATANNANNCATANNANNCATGGATATATCTCCTACTTAAAG	GGCGTAATACGACTCACTATAG	TTTCCGCCCCCCGTCCTAACCGTTAGTCACACCCGT
12-2	fMXMXXMXXMXXMTGVTNG	GGGUUGAACUUUAAGUAGGAGAUAUAUCCAUGNNUAUGNNUNNUAUGNNUNNUAUGNNUNNUAUGACGGGUGUGACUAACGGUUAGGACGGGGGGCGGAAA	TAATACGACTCACTATAGGGTTGAACTTTAAGTAGGAGATATATCCAT	ACCGTTAGTCACACCCGTCATANNANNCATANNANNCATANNANNCATANNCATGGATATATCTCCTACTTAAAG	GGCGTAATACGACTCACTATAG	TTTCCGCCCCCCGTCCTAACCGTTAGTCACACCCGT
13-1	fMXXMXXMXXMXXMTGVTNG	GGGUUGAACUUUAAGUAGGAGAUAUAUCCAUGNNUNNUAUGNNUNNUAUGNNUNNUAUGNNUNNUAUGACGGGUGUGACUAACGGUUAGGACGGGGGGCGGAAA	TAATACGACTCACTATAGGGTTGAACTTTAAGTAGGAGATATATCCAT	ACCGTTAGTCACACCCGTCATANNANNCATANNANNCATANNANNCATANNANNCATGGATATATCTCCTACTTAAAG	GGCGTAATACGACTCACTATAG	TTTCCGCCCCCCGTCCTAACCGTTAGTCACACCCGT
13-2	fMXMXXMXXMXXMXTGVTNG	GGGUUGAACUUUAAGUAGGAGAUAUAUCCAUGNNUAUGNNUNNUAUGNNUNNUAUGNNUNNUAUGNNUACGGGUGUGACUAACGGUUAGGACGGGGGGCGGAAA	TAATACGACTCACTATAGGGTTGAACTTTAAGTAGGAGATATATCCAT	ACCGTTAGTCACACCCGTANNCATANNANNCATANNANNCATANNANNCATANNCATGGATATATCTCCTACTTAAAG	GGCGTAATACGACTCACTATAG	TTTCCGCCCCCCGTCCTAACCGTTAGTCACACCCGT
14-1	fMXXMXXMXXMXXMXTGVTNG	GGGUUGAACUUUAAGUAGGAGAUAUAUCCAUGNNUNNUAUGNNUNNUAUGNNUNNUAUGNNUNNUAUGNNUACGGGUGUGACUAACGGUUAGGACGGGGGGCGGAAA	TAATACGACTCACTATAGGGTTGAACTTTAAGTAGGAGATATATCCAT	ACCGTTAGTCACACCCGTANNCATANNANNCATANNANNCATANNANNCATANNANNCATGGATATATCTCCTACTTAAAG	GGCGTAATACGACTCACTATAG	TTTCCGCCCCCCGTCCTAACCGTTAGTCACACCCGT
14-2	fMXMXXMXXMXXMXXTGVTNG	GGGUUGAACUUUAAGUAGGAGAUAUAUCCAUGNNUAUGNNUNNUAUGNNUNNUAUGNNUNNUAUGNNUNNUACGGGUGUGACUAACGGUUAGGACGGGGGGCGGAAA	TAATACGACTCACTATAGGGTTGAACTTTAAGTAGGAGATATATCCAT	ACCGTTAGTCACACCCGTANNANNCATANNANNCATANNANNCATANNANNCATANNCATGGATATATCTCCTACTTAAAG	GGCGTAATACGACTCACTATAG	TTTCCGCCCCCCGTCCTAACCGTTAGTCACACCCGT
15-1	fMXXMXXMXXMXXMXXTGVTNG	GGGUUGAACUUUAAGUAGGAGAUAUAUCCAUGNNUNNUAUGNNUNNUAUGNNUNNUAUGNNUNNUAUGNNUNNUACGGGUGUGACUAACGGUUAGGACGGGGGGCGGAAA	TAATACGACTCACTATAGGGTTGAACTTTAAGTAGGAGATATATCCAT	ACCGTTAGTCACACCCGTANNANNCATANNANNCATANNANNCATANNANNCATANNANNCATGGATATATCTCCTACTTAAAG	GGCGTAATACGACTCACTATAG	TTTCCGCCCCCCGTCCTAACCGTTAGTCACACCCGT
15-2	fMXMXXMXXMXXMXXMTGVTNG	GGGUUGAACUUUAAGUAGGAGAUAUAUCCAUGNNUAUGNNUNNUAUGNNUNNUAUGNNUNNUAUGNNUNNUAUGACGGGUGUGACUAACGGUUAGGACGGGGGGCGGAAA	TAATACGACTCACTATAGGGTTGAACTTTAAGTAGGAGATATATCCAT	ACCGTTAGTCACACCCGTCATANNANNCATANNANNCATANNANNCATANNANNCATANNCATGGATATATCTCCTACTTAAAG	GGCGTAATACGACTCACTATAG	TTTCCGCCCCCCGTCCTAACCGTTAGTCACACCCGT
model15.R84	fMKMKKMKYMKYMKYMTGVTNG	GGGUUGAACUUUAAGUAGGAGAUAUAUCCAUGAAGAUGAAGAAGAUGAAGUACAUGAAGUACAUGAAAUAUAUGACGGGUGUGACUAACGGUUAGGACGGGGGGCGGAAA	TAATACGACTCACTATAGGGTTGAACTTTAAGTAGGAGATATATCCAT	ACCGTTAGTCACACCCGT CATATATTTCATGTACTTCATGTACTTCATCTTCTTCATCTTCAT GGATATATCTCCTACTTAAAG	GGCGTAATACGACTCACTATAG	TTTCCGCCCCCCGTCCTAACCGTTAGTCACACCCGT

## Sheet: Supplementary Table 2
Supplementary Table 2. Results of NGS of cDNA obtained from the RaPID selection against Mpro
Top 100 peptide sequences and their read frequencies at the 6th and 7th round of the RaPID selection.
Sequences with top 100 are shown.
initial Y : Ac-L-Tyr, β : (1S,2S)-2-ACPC, * : stop codon
The C-terminal linker sequence, TGVTNG, is omitted from peptide sequences.
(A) 6th round				(B) 7th round
Peptide sequence	Read %	Peptide name		Peptide sequence	Read %	Peptide name
YPβFGIVFβGHβCN	13.4702	Mph1		YPβFGIVFβGHβCN	11.5043	Mph1
YPβFGIVFVGHβCN	2.7003			YILFβGHβCSβRH	6.923	Mph2
YILFβGHβCSβRH	2.61136	Mph2		YPβFGIVFVGHβCN	5.88224
YIFFβGHβCSβRH	1.44938			YIIRFVGHβCSβT	2.22222
YRFβRNβVFβFYβTD	0.939628	Mph3		YIFFβGHβCSβRH	1.2123
YIPIRFβGHβCSβNN	0.760102	Mph4		YPβFGIVFIGHβCN	1.06196
YIIRFVGHβCSβT	0.738691			YIPIRFVGHβCSβNN	1.05425
YPβFGIVFIGHβCN	0.494108			YIFFIGHβCSβRH	0.975234
YIFFIGHβCSβRH	0.430697			YIPIRFβGHβCSβNN	0.92705	Mph4
YFIRFβGHβCNβY	0.402698			YIIRFVGHβCSVT	0.570492
YIIRFβGHβCSβT	0.381286			YDβFYβYVTFHVAT	0.495326	Mph5
YANIVFβGHβCRβYN	0.349993			YFIRFβGHβCNβY	0.470271
YIPIRFVGHβCSβNN	0.331052			YILFVGHβCSβRH	0.454852
YPβFGIVFβGHβCS	0.223172			YILFIGHβCSβRH	0.433651
YDβFYβYVTFHVAT	0.214113	Mph5		YRFβRNβVFβFYβTD	0.379686	Mph3
YIIRFVGHβCSVT	0.181996			YIIRFβGHβCSβT	0.300665
YIFLWVICVVCVIRV*LT	0.12435			YANIVFIGHβCRβYN	0.206225
YPβFGIVFβGHTCN	0.110351			YPβFGIVFβGHβCS	0.192734
YPβLGIVFβGHβCN	0.10788			YDβFYβYVVFHVAT	0.188879
YGHβHHIRFVGHβCN	0.096351			YFIRFVGHβCNβY	0.188879
YDβFYβYVVFHVAT	0.094704			YANIVFβGHβCRβYN	0.179243
YILFIGHβCSβRH	0.0856453			YIFLWVICVVCVIRV*LT	0.132986
YCDβNFβIFβLYIHY	0.0782337			YPβFGIVFVGHTCN	0.11564
YPβFGIVFβGHβRN	0.0741162			YCDβNFβIFβLYIHY	0.111786
YANIVFIGHβCRβYN	0.0716456			YCDβNFITFβLYIHY	0.0925123
YILFVGHβCSβRH	0.0708221			YPβFGIVFVGHβCS	0.0886576
YPβFGIVFVGHTCN	0.0699986			YGHβHHIRFVGHβCN	0.0790209
YPTFGIVFβGHβCN	0.0667045			YIFL*VICVVCVIRV*LT	0.0790209
YPβFGIVFβGHβCD	0.064234			YILFβGHβCSTRH	0.0751662
YPβFGIVLβGHβCN	0.064234			YILFβGHβCSβRR	0.0732389
YFIRFVGHβCNβY	0.06094			YPβFGIVFβGHTCN	0.0713116
YPβFGIVFTGHβCN	0.06094			YILFTGHβCSβRH	0.0616749
YPβFGVVFβGHβCN	0.06094			YPβFGIVFVGHVCN	0.0597475
YPβFGIVFβGHβCK	0.0601164			YIFFVGHβCSβRH	0.0578202
YPβFGIIFβGHβCN	0.0592929			YPβFGIIFβGHβCN	0.0578202
YPβFGIVFβGRβCN	0.0592929			YPβFGIVFVGHβRN	0.0578202
YPβFGIVSβGHβCN	0.0584694			YPβFGIVFβGHβCK	0.0578202
YGHβHHIRFβGHβCN	0.0518813			YPTFGIVFβGHβCN	0.0558928
YPβFGIVFβGHVCN	0.0518813			IPβFGIVFβGHβCN	0.0539655
YPβFGIVFβGHβCY	0.0518813			YPβFGIVFβGHβRN	0.0520382
IPβFGIVFβGHβCN	0.0510578			YCDβNFVIFβLYIHY	0.0501108
YPβSGIVFβGHβCN	0.0477638			YIIRFVGHβCSTT	0.0501108
YIFL*VICVVCVIRV*LT	0.0452932			YPβFGIVFTGHβCN	0.0501108
YPVFGIVFβGHβCN	0.0428227			YPβFGIVFβGHβCY	0.0501108
YPβFGIAFβGHβCN	0.0403521			YPβLGIVFβGHβCN	0.0501108
YPYIIFβAFβCNβRF	0.0395286			YIIRFVGHβCRβT	0.0481835
YPβYGIVFβGHβCN	0.0395286			YPβFGIVFβGHβCD	0.0481835
YPβFGTVFβGHβCN	0.0378816			YILFβGHTCSβRH	0.0462561
YPβFGIVFβGHβCI	0.0329405			YPβFGIVLβGHβCN	0.0462561
YIFFVGHβCSβRH	0.032117			IPβFGIVFVGHβCN	0.0424015
YILFβGHβCSβRR	0.032117			YILFβGHβCSVRH	0.0424015
YPβFGIVLWVICVIRV*LT	0.0312935			YPβFGVVFβGHβCN	0.0404741
YPβFGIVFLGHβCN	0.03047			YTNβYGIVFβAFβCS	0.0404741
YSβHTIIFβAFβC	0.0296465			YCDβNFTIFβLYIHY	0.0385468
YILFβGHβCSTRH	0.028823			YPβFGIVFβGRβCN	0.0385468
YSβFGIVFβGHβCN	0.028823			YPβFGTVFβGHβCN	0.0385468
YPβFGIVFVGHVCN	0.0279994			YPβLGIVFVGHβCN	0.0385468
YPβFGIVFβGHβSN	0.0279994			YPβSGIVFβGHβCN	0.0385468
YPβLGIVFVGHβCN	0.0271759			YSβFGIVFβGHβCN	0.0385468
YCβLVβFHLHFβS	0.0263524			YSβFGIVFVGHβCN	0.0366194
YPβFGIVFVGHβCS	0.0263524			YILFβGHβCGβRH	0.0346921
YPβFGIVFβGHβYN	0.0263524			YILFβGHβRSβRH	0.0346921
YTNβYGIVFβAFβCS	0.0263524			YPβFGIVFVGHβCD	0.0346921
TPβFGIVFβGHβCN	0.0255289			YPβFGIVFβGHVCN	0.0346921
YPβFGIVFβGQβCN	0.0255289			YILFβGHβCNβRH	0.0327648
YPβFSIVFβGHβCN	0.0255289			YPβFGIAFVGHβCN	0.0327648
YILFTGHβCSβRH	0.0247054			YPβFGIAFβGHβCN	0.0327648
YPIFGIVFβGHβCN	0.0247054			YYVVFVGHβCTβY	0.0327648
YPβFGIVFβSHβCN	0.0247054			YCβLVβFHLHFβS	0.0308374
YFIRFβGHβCNβH	0.0238819			YILFβGHβCSIRH	0.0308374
YPβFGIVFVGHβRN	0.0230584			YILFβGRβCSβRH	0.0308374
YPβFGIVFβGHKCN	0.0230584			YPβFGIIFVGHβCN	0.0308374
YPβSGIVFVGHβCN	0.0230584			YPβFGIVFβGHβCI	0.0308374
YILFβGHTCSβRH	0.0222348			YPβYGIVFβGHβCN	0.0308374
YPβFGIVFβGHICN	0.0222348			YILFβGHβCSβRHAGVTNG	0.0289101	(same as Mph2)
YPβFGIVFβGHβCNTGVANG	0.0222348	(same as Mph1)		YPβFGIVLWVICVIRV*LT	0.0289101
YPβFGβVFβGHβCN	0.0222348	Mph6		YIIRFVGHβCSIT	0.0269828
YCβLNβIILHFβN	0.0214113			YILFβGHβCN	0.0269828
YPLFGIVFβGHβCN	0.0214113			YILFβGHβCRβRH	0.0269828
YPKFGIVFβGHβCN	0.0205878			YILFβGHβCSLRH	0.0269828
YPβFGIVFβGHβCNTGATNG	0.0205878	(same as Mph1)		YILSβGHβCSβRH	0.0269828
YYVVFβGHβCTβY	0.0197643			YPβFGIVFβGQβCN	0.0269828
YISFβGHβCSβRH	0.0189408			YPβFGIVSVGHβCN	0.0269828
YPβFGIVFβGHβCNTGVTSG	0.0189408	(same as Mph1)		YPβSGIVFVGHβCN	0.0269828
YPβFGIVLVGHβCN	0.0189408			YPβYGIVFIGHβCN	0.0269828
YPβFDIVFβGHβCN	0.0181173			YPβYGIVFVGHβCN	0.0269828
YPβFGIVFβGHβ*N	0.0181173			YCβLNβIILHFβN	0.0250554
YPβFGIVFβGLβCN	0.0181173			YIIFβGHβCSβRH	0.0250554
YPβFGLVFβGHβCN	0.0181173			YILLWVICVVCVTRV*LT	0.0250554
YSIIFIGHβYNβRGβ	0.0181173			YILLβGHβCSβRH	0.0250554
YANIIFβGFβCSTTT	0.0172938			YIPIRFIGHβCSβNN	0.0250554
YIFFYGSYV*YASYGCD*R	0.0172938			YPβFGIVFAGHβCN	0.0250554
YILFβGHβCGβRH	0.0172938			YPβFGIVLVGHβCN	0.0250554
YPβFGVVFVGHβCN	0.0172938			YPβFGVVFVGHβCN	0.0250554
YITβSLβCFIVSβIN	0.0164703			YPβFGβVFβGHβCN	0.0250554	Mph6
YLβFGIVFβGHβCN	0.0164703			YTLFβGHβCSβRH	0.0250554
YPβFGIVFβGHβCNTGVTT	0.0164703	(same as Mph1)		YDβFYβYVTFHVAI	0.0231281
YCIβARβFFIHFβ	0.0156467			YFIRFβGHβCNβH	0.0231281
YIFLWVICVVCVTRV*LT	0.0156467			YILFβGHβCSβCH	0.0231281
YPFβCFβYVβLVβL	0.0156467			YIPFβGHβCSβRH	0.0231281
